# Supplementary material for: Evaluation of Electrical Impedance as a Biomarker of Myostatin Inhibition in Wild Type and Muscular Dystrophy Mice
Source: PubMed Central journal article supplement (PMC4618134; doi:10.1371/journal.pone.0140521), 2015-10-20
Supplement: pone.0140521.s001.pdf [file pone.0140521.s001.pdf]

## Supplementary materials for

Evaluation of electrical impedance as a biomarker of myostatin inhibition in wild type and muscular dystrophy mice

Benjamin Sanchez<sup>1,\*</sup>, Jia Li<sup>1</sup>, Sung Yim<sup>1</sup>, Adam Pacheck<sup>1</sup>, Jeffrey J Widrick<sup>2</sup>, Seward B Rutkove<sup>1</sup>

**1 Department of Neurology, Division of Neuromuscular Diseases, Beth Israel Deaconess Medical Center, Harvard Medical School, Boston, MA 02215-5491, USA.**

**2 Division of Genetics and Genomics, Boston Children's Hospital, Harvard Medical School, Boston, MA 02215-5491, USA.**

**\* Corresponding author**

**E-mail: [bsanchez@bidmc.harvard.edu](mailto:bsanchez@bidmc.harvard.edu)**

**Supplementary Table 1.** Estimated parameters  $\hat{x}$  and their standard errors  $\hat{\sigma}_{\hat{x}}$  in wild-type (wt) and muscular dystrophy (mdx) mice. Parameters:  $\mu$  and  $s$ , mean myofiber area and standard deviation;  $\omega_c$ , Cole central frequency;  $R_0/R_\infty$  Cole resistance ratio;  $\mathcal{F}$ , maximum isometric force;  $m$ , muscle mass;  $L_o$ , optimal length.

|                          | Animal | $\hat{\mu} \pm \hat{\sigma}_{\hat{\mu}}^\dagger$<br>( $\mu\text{m}^2$ ) | $\hat{s} \pm \hat{\sigma}_{\hat{s}}^\dagger$<br>( $\mu\text{m}^2$ )              | $\hat{\omega}_c \pm \hat{\sigma}_{\hat{\omega}_c}$<br>(kHz) | $\hat{R}_0/\hat{R}_\infty \pm \hat{\sigma}_{\hat{R}_0/\hat{R}_\infty}^\S$<br>- | $\hat{\mathcal{F}}_{\max} \pm \hat{\sigma}_{\hat{\mathcal{F}}_{\max}}$<br>(N) | $m^*$<br>(g) | $L_o^*$<br>(mm) |
|--------------------------|--------|-------------------------------------------------------------------------|----------------------------------------------------------------------------------|-------------------------------------------------------------|--------------------------------------------------------------------------------|-------------------------------------------------------------------------------|--------------|-----------------|
| WT <sub>untreated</sub>  | 1      | 2614±85                                                                 | 848±60                                                                           | 61.4±1.4                                                    | 5.5±0.09                                                                       | 3.7±0.1                                                                       | 0.21         | 17.1            |
|                          | 2      | 2175±45                                                                 | 454±32                                                                           | 61.7±0.7                                                    | 4.6±0.04                                                                       | 4.7±0.2                                                                       | 0.17         | 18.1            |
|                          | 3      | 1871±66                                                                 | 656±47                                                                           | 64.2±1.9                                                    | 4.7±0.08                                                                       | 5.4±0.3                                                                       | 0.19         | 16.2            |
|                          | 4      | 2659±52                                                                 | 523±37                                                                           | 69.9±0.7                                                    | 3.6±0.02                                                                       | 2.6±0.1                                                                       | 0.23         | 18.4            |
|                          | 5      | 2454±82                                                                 | 816±58                                                                           | 77.1±1.3                                                    | 4.8±0.08                                                                       | 2.9±0.1                                                                       | 0.19         | 15.8            |
|                          | 6      | 2548±60                                                                 | 599±43                                                                           | 51.7±0.2                                                    | 4.0±0.03                                                                       | 3.9±0.1                                                                       | 0.21         | 17.0            |
| WT <sub>RAP-031</sub>    | 1      | 2601±98                                                                 | 984±70                                                                           | 32.6±2.0                                                    | 6.1±0.14                                                                       | 3.5±0.1                                                                       | 0.27         | 16.5            |
|                          | 2      | 2713±87                                                                 | 869±62                                                                           | 37.2±0.5                                                    | 6.2±0.06                                                                       | 4.7±0.1                                                                       | 0.23         | 16.4            |
|                          | 3      | 3364±89                                                                 | 893±64                                                                           | 50.4±1.1                                                    | 5.3±0.07                                                                       | 5.1±0.3                                                                       | 0.26         | 18.8            |
|                          | 4      | 2155±96                                                                 | 957±68                                                                           | 52.9±0.7                                                    | 5.3±0.05                                                                       | 5.2±0.2                                                                       | 0.28         | 17.6            |
|                          | 5      | 2949±69                                                                 | 694±49                                                                           | 38.0±1.1                                                    | 6.1±0.11                                                                       | 4.9±0.1                                                                       | 0.28         | 18.6            |
|                          | 6      | 2500±57                                                                 | 571±41                                                                           | 63.3±0.6                                                    | 6.5±0.15                                                                       | 5.2±0.2                                                                       | 0.25         | 18.3            |
|                          | 7      | *                                                                       | *                                                                                | 65.1±1.2                                                    | 3.4±0.06                                                                       | 5.6±0.6                                                                       | 0.30         | 18.5            |
|                          | 8      | 1898±53                                                                 | 533±38                                                                           | 51.2±2.0                                                    | 5.1±0.12                                                                       | 4.6±0.1                                                                       | 0.26         | 16.8            |
|                          | Animal | $\hat{\mu} \pm \hat{\sigma}_{\hat{\mu}}^\dagger$<br>( $\mu\text{m}^2$ ) | $\hat{\lambda} \pm \hat{\sigma}_{\hat{\lambda}}^\ddagger$<br>( $\mu\text{m}^2$ ) | $\hat{\omega}_c \pm \hat{\sigma}_{\hat{\omega}_c}$<br>(kHz) | $\hat{R}_0/\hat{R}_\infty \pm \hat{\sigma}_{\hat{R}_0/\hat{R}_\infty}^\S$<br>- | $\hat{\mathcal{F}}_{\max} \pm \hat{\sigma}_{\hat{\mathcal{F}}_{\max}}$<br>(N) | $m^*$<br>(g) | $L_o^*$<br>(mm) |
| MDX <sub>untreated</sub> | 1      | 1317±119                                                                | 1602±227                                                                         | 52.6±0.4                                                    | 4.8±0.006                                                                      | 2.7±0.4                                                                       | 0.25         | 16.4            |
|                          | 2      | 1760±100                                                                | 5420±766                                                                         | 32.8±0.3                                                    | 4.4±0.003                                                                      | 3.7±0.2                                                                       | 0.22         | 15.3            |
|                          | 3      | 1618±180                                                                | 1297±183                                                                         | 45.6±0.3                                                    | 4.6±0.003                                                                      | 3.4±0.2                                                                       | 0.25         | 15.5            |
|                          | 4      | 2982±195                                                                | 6967±985                                                                         | 51.3±2.2                                                    | 4.3±0.008                                                                      | 2.6±0.3                                                                       | 0.19         | 15.5            |
|                          | 5      | 1000±67                                                                 | 2216±313                                                                         | 31.8±0.4                                                    | 6.8±0.33                                                                       | 2.9±0.2                                                                       | 0.24         | 16.1            |
|                          | 6      | *                                                                       | *                                                                                | 43.7±0.7                                                    | 4.8±0.05                                                                       | 2.9±1.1                                                                       | 0.25         | 18.3            |
|                          | 7      | 1955±186                                                                | 2133±300                                                                         | 74.3±0.9                                                    | 3.0±0.02                                                                       | 2.4±0.3                                                                       | 0.22         | 14.4            |
|                          | 8      | 1886±138                                                                | 3540±501                                                                         | 45.1±0.3                                                    | 5.2±0.06                                                                       | 3.1±0.4                                                                       | 0.23         | 15.2            |
|                          | 9      | 1869±110                                                                | 5405±764                                                                         | 86.4±7.8                                                    | 3.6±0.31                                                                       | 2.6±2.3                                                                       | 0.24         | 15.7            |
| MDX <sub>RAP-031</sub>   | 1      | 1416±133                                                                | 1595±225                                                                         | 41.5±0.9                                                    | 4.3±0.05                                                                       | 2.9±0.8                                                                       | 0.25         | 16.3            |
|                          | 2      | 2076±206                                                                | 2102±297                                                                         | 30.3±0.6                                                    | 4.4±0.03                                                                       | 2.5±0.3                                                                       | 0.31         | 17.9            |
|                          | 3      | 1261±110                                                                | 1658±234                                                                         | 50.8±1.2                                                    | 4.4±0.05                                                                       | 2.4±0.1                                                                       | 0.33         | 16.3            |
|                          | 4      | 1921±187                                                                | 2024±286                                                                         | 40.9±1.5                                                    | 4.4±0.06                                                                       | 2.7±0.6                                                                       | 0.33         | 16.6            |
|                          | 5      | 1905±162                                                                | 2623±371                                                                         | 39.1±0.4                                                    | 4.4±0.02                                                                       | 4.1±0.3                                                                       | 0.33         | 16.7            |
|                          | 6      | 2449±169                                                                | 5131±725                                                                         | 34.2±1.0                                                    | 5.0±0.08                                                                       | 2.8±0.5                                                                       | 0.27         | 15.2            |
|                          | 7      | 1416±94                                                                 | 3189±451                                                                         | 55.9±1.2                                                    | 4.0±0.05                                                                       | 3.0±0.5                                                                       | 0.31         | 16.7            |
|                          | 8      | 3525±185                                                                | 12707±1797                                                                       | 42.8±0.5                                                    | 5.0±0.04                                                                       | 2.8±0.2                                                                       | 0.31         | 17.9            |
|                          | 9      | 2318±146                                                                | 5827±824                                                                         | 49.0±1.2                                                    | 5.8±0.11                                                                       | 3.2±0.3                                                                       | 0.31         | 15.4            |
|                          | 10     | 1899±142                                                                | 3367±476                                                                         | 41.8±0.7                                                    | 4.2±0.05                                                                       | 3.2±0.1                                                                       | 0.24         | 15.1            |

\* Not determined.

† Myofiber cross-sectional area distribution mean  $\mu$  and standard deviation  $s$  parameters of a normal distribution

$$f(x; \mu, s) = \frac{1}{s\sqrt{2\pi}} e^{-\frac{(x-\mu)^2}{2s^2}}.$$

‡ Myofiber cross-sectional area distribution scale  $\mu$  and shape  $\lambda$  parameters of an inverse Gaussian distribution

$$f(x; \mu, \lambda) = \sqrt{\frac{\lambda}{2\pi x^3}} e^{-\frac{\lambda(x-\mu)^2}{2\mu^2 x}}.$$

§ The estimated resistance ratio standard error is approximated as  $\hat{\sigma}_{\hat{R}_0/\hat{R}_\infty} \approx \sqrt{\left(\frac{1}{\hat{R}_\infty}\right)^2 \hat{\sigma}_{\hat{R}_0}^2 + \left(\frac{-\hat{R}_0}{\hat{R}_\infty^2}\right)^2 \hat{\sigma}_{\hat{R}_\infty}^2}$ , assuming  $\hat{R}_0$  and  $\hat{R}_\infty$  uncorrelated variables.

\* The muscle mass ( $m$ ) and the muscle optimal length ( $L_o$ ) are not the result of an estimation process and therefore are denoted without  $\hat{\cdot}$ .
